# Supplementary material for: The synthesis and tissue adhesiveness of temperature-sensitive hyperbranched poly(amino acid)s with functional side groups
Source: Royal Society of Chemistry journal article supplement (doi:10.1039/c5py01844g), 2016-01-01
Supplement: c5py01844g1.pdf [file c5py01844g1.pdf]

## **Synthesis and tissue adhesiveness of temperature-sensitive hyperbranched poly(amino acid)s with functional side groups**

*Dedai Lu\*, Yongyong Zhang, Ting'e Li, Yunfei Li, Hongsen Wang, Zhiqiang Shen, Qiangbing Wei, Ziqiang Lei*

Key Laboratory of Eco-environment-related Polymer Materials Ministry of Education, Key Laboratory of Polymer Materials of Gansu Province, School of Chemistry and Chemical Engineering, Northwest Normal University, Lanzhou, 730070, P. R. China.

\*Corresponding author: E-mail: [ludedai@126.com](mailto:ludedai@126.com). Telephone: (0931) 7975521. Fax.: (0931)

7975521.

## 1. $^1\text{H}$ NMR spectra

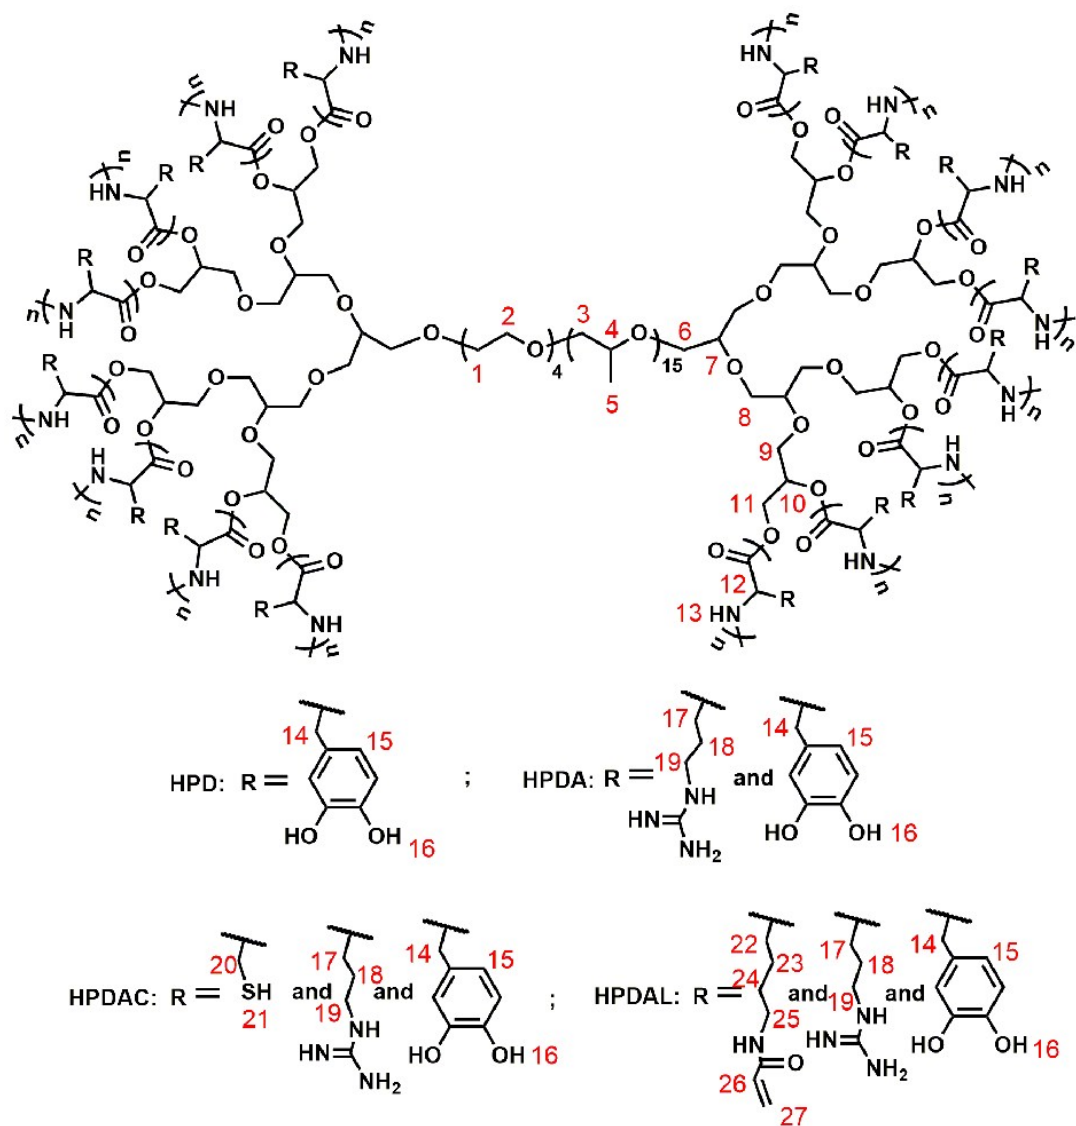

**Fig. S1a** Numbering of copolymeric carbon

Because copolymers were precipitated in ethyl alcohol, the methylic proton signals of ethyl alcohol appeared in  $^1\text{H}$  NMR spectroscopy.

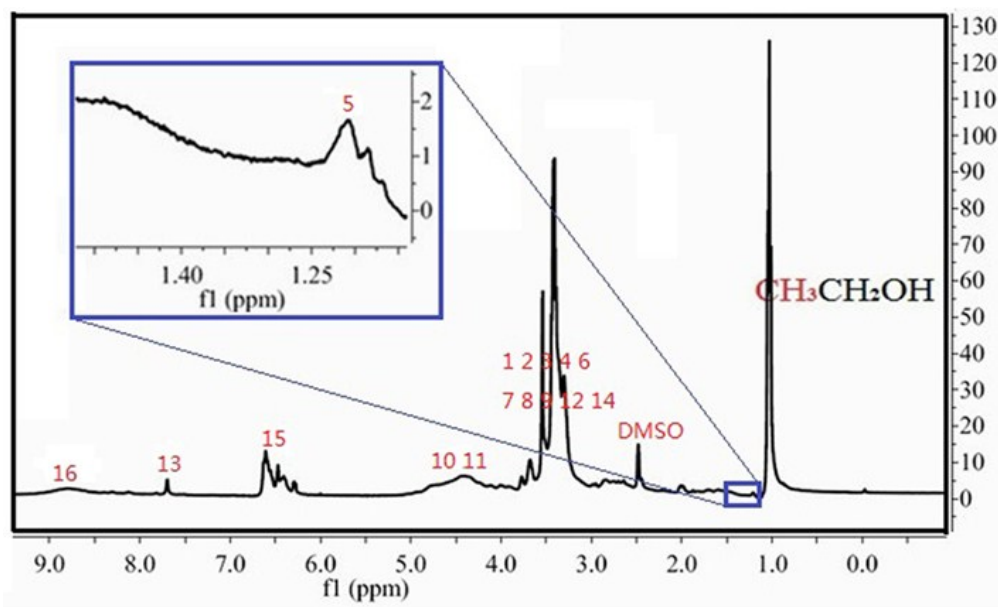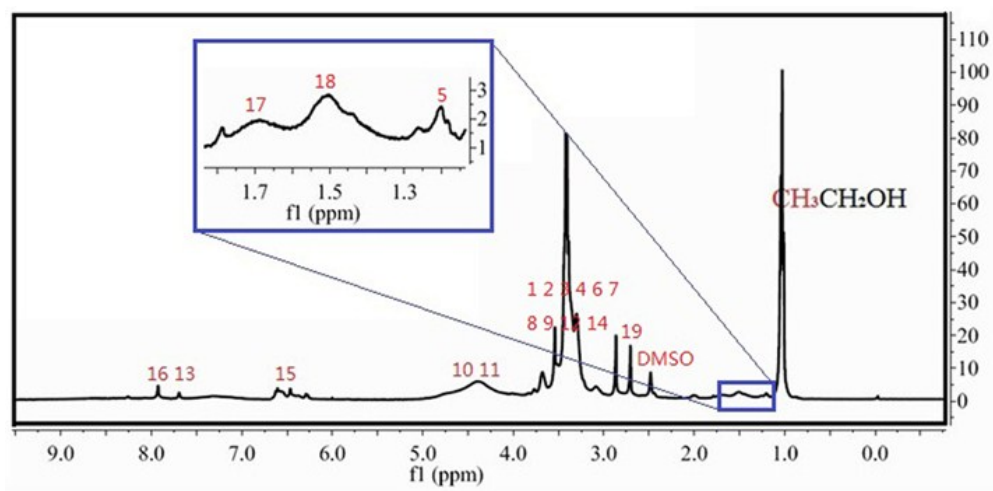

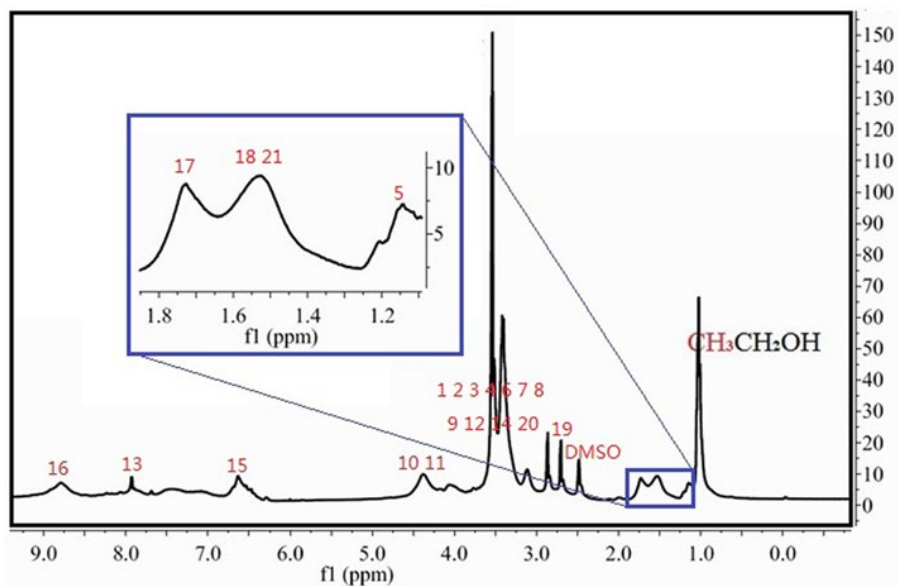

**Fig. S1d**  $^1\text{H}$  NMR spectra of HPDAC

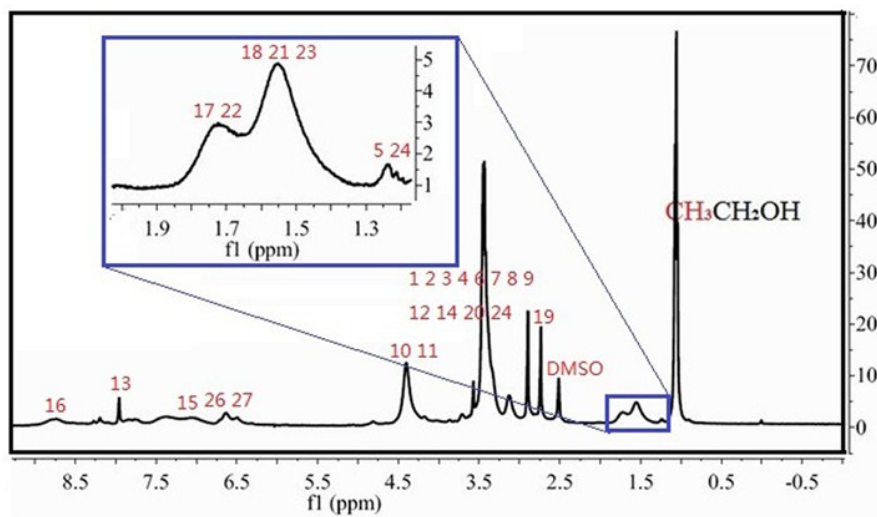

**Fig. S1e**  $^1\text{H}$  NMR spectra of HPDAL

## 2. Cytotoxicity of HPD, HPDA, HPDAC and HPDAL

Following picture show that cell relative proliferation of HPD, HPDA, HPDAC and HPDAL at 24, 48, 72 h.

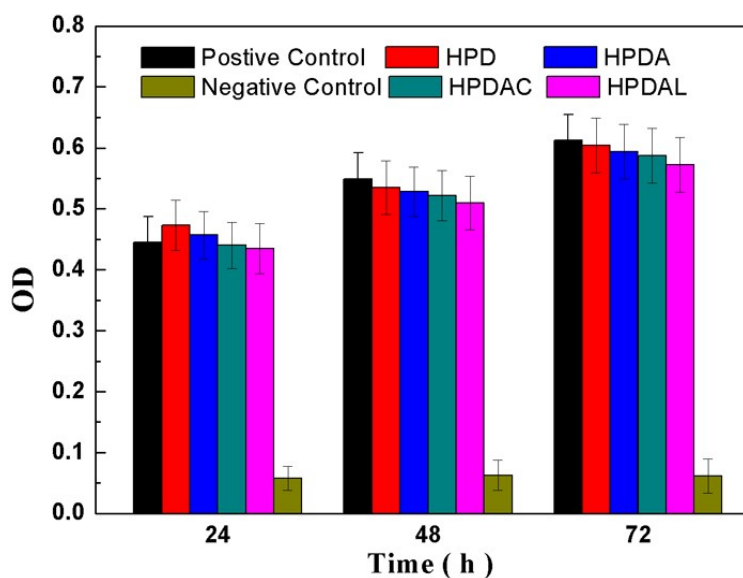

Fig. S2a The OD value of HPD, HPDA, HPDAC and HPDAL

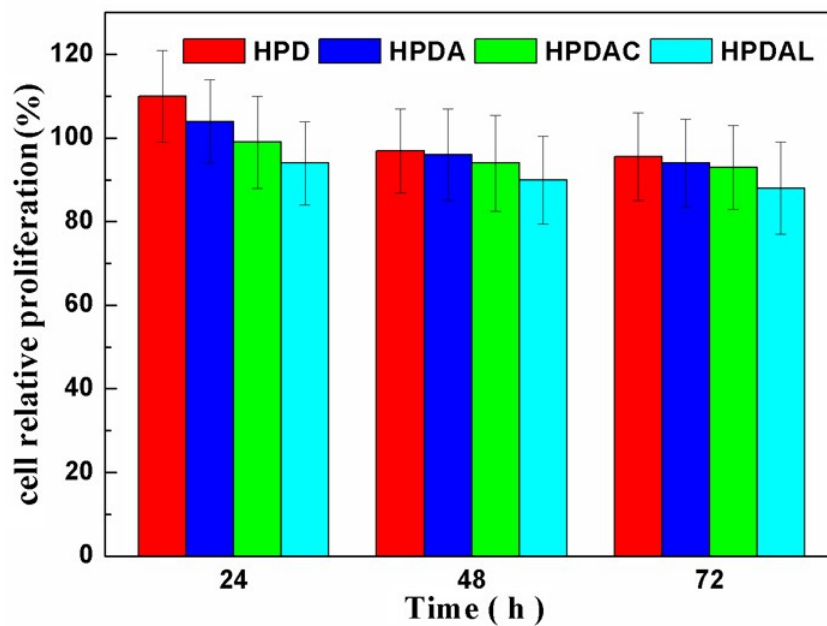

Fig. S2b cell relative proliferation of HPD, HPDA, HPDAC and HPDAL
